# Supplementary material
Source: publisher site journal article supplement (https://www.spandidos-publications.com/5799/downloadSupplementary)
Supplement: Supplementary file 1 [file downloadSupplementary]

## Sheet: Sheet1
Table SV. The royal blue module included a total of 103 genes
Gene	dynamicModule	mergeModule
ACYP1	royalblue	royalblue
ATP5G1	royalblue	royalblue
BDH	royalblue	royalblue
BOLA2	royalblue	royalblue
BRCA1	royalblue	royalblue
C13orf3	royalblue	royalblue
C15orf42	royalblue	royalblue
C16orf53	royalblue	royalblue
C18orf24	royalblue	royalblue
C18orf56	royalblue	royalblue
C19orf48	royalblue	royalblue
C1orf135	royalblue	royalblue
C1orf33	royalblue	royalblue
C9orf100	royalblue	royalblue
C9orf119	royalblue	royalblue
CASC5	royalblue	royalblue
CCDC34	royalblue	royalblue
CCNB1	royalblue	royalblue
CCNE1	royalblue	royalblue
CCNF	royalblue	royalblue
CDC20	royalblue	royalblue
CDC25A	royalblue	royalblue
CDC25C	royalblue	royalblue
CDCA2	royalblue	royalblue
CDCA3	royalblue	royalblue
CDKN2A	royalblue	royalblue
CDT1	royalblue	royalblue
CENPF	royalblue	royalblue
CSE1L	royalblue	royalblue
DIAPH3	royalblue	royalblue
DKC1	royalblue	royalblue
DLL3	royalblue	royalblue
DNAJB11	royalblue	royalblue
DSP	royalblue	royalblue
EMG1	royalblue	royalblue
ESPL1	royalblue	royalblue
EXOSC2	royalblue	royalblue
EXOSC4	royalblue	royalblue
EXOSC5	royalblue	royalblue
FAM72A	royalblue	royalblue
FBXO5	royalblue	royalblue
FLJ13909	royalblue	royalblue
FLJ21945	royalblue	royalblue
FLJ32363	royalblue	royalblue
FOXD1	royalblue	royalblue
FOXM1	royalblue	royalblue
GAPDH	royalblue	royalblue
GNG4	royalblue	royalblue
GPR19	royalblue	royalblue
GRPEL2	royalblue	royalblue
GSG2	royalblue	royalblue
GTF3C4	royalblue	royalblue
HCAP-G	royalblue	royalblue
HIST1H4C	royalblue	royalblue
HYLS1	royalblue	royalblue
IPO4	royalblue	royalblue
KIF14	royalblue	royalblue
KIF20A	royalblue	royalblue
KIF2C	royalblue	royalblue
KIFC1	royalblue	royalblue
LIN9	royalblue	royalblue
LMNB2	royalblue	royalblue
LOC440686	royalblue	royalblue
LSG1	royalblue	royalblue
LSM4	royalblue	royalblue
MCM10	royalblue	royalblue
MED6	royalblue	royalblue
METAP2	royalblue	royalblue
MGC13096	royalblue	royalblue
MGC14141	royalblue	royalblue
MGC5352	royalblue	royalblue
MRPL12	royalblue	royalblue
MRPS12	royalblue	royalblue
MSH6	royalblue	royalblue
MTBP	royalblue	royalblue
MYOHD1	royalblue	royalblue
NUF2	royalblue	royalblue
OBFC2B	royalblue	royalblue
POLA2	royalblue	royalblue
POLQ	royalblue	royalblue
POLR2H	royalblue	royalblue
PPP1R14B	royalblue	royalblue
PRC1	royalblue	royalblue
PSMB4	royalblue	royalblue
RAD54L	royalblue	royalblue
RCOR2	royalblue	royalblue
RIMS2	royalblue	royalblue
RPL36A	royalblue	royalblue
RPP40	royalblue	royalblue
RPRM	royalblue	royalblue
RRM1	royalblue	royalblue
SAAL1	royalblue	royalblue
SDHC	royalblue	royalblue
SGOL1	royalblue	royalblue
SMC2	royalblue	royalblue
STIP1	royalblue	royalblue
TACC3	royalblue	royalblue
TIMM10	royalblue	royalblue
TTK	royalblue	royalblue
UCK2	royalblue	royalblue
UPF3B	royalblue	royalblue
WDR67	royalblue	royalblue
ZNF31	royalblue	royalblue
